# Supplementary material for: Real-world experience of afatinib as a first-line therapy for advanced EGFR mutation-positive lung adenocarcinoma
Source: PubMed Central journal article supplement (PMC5685763; doi:10.18632/oncotarget.19563), 2017-07-26
Supplement: oncotarget-08-90430-s001.pdf [file oncotarget-08-90430-s001.pdf]

# Real-world experience of afatinib as a first-line therapy for advanced *EGFR* mutation-positive lung adenocarcinoma

## SUPPLEMENTARY MATERIALS

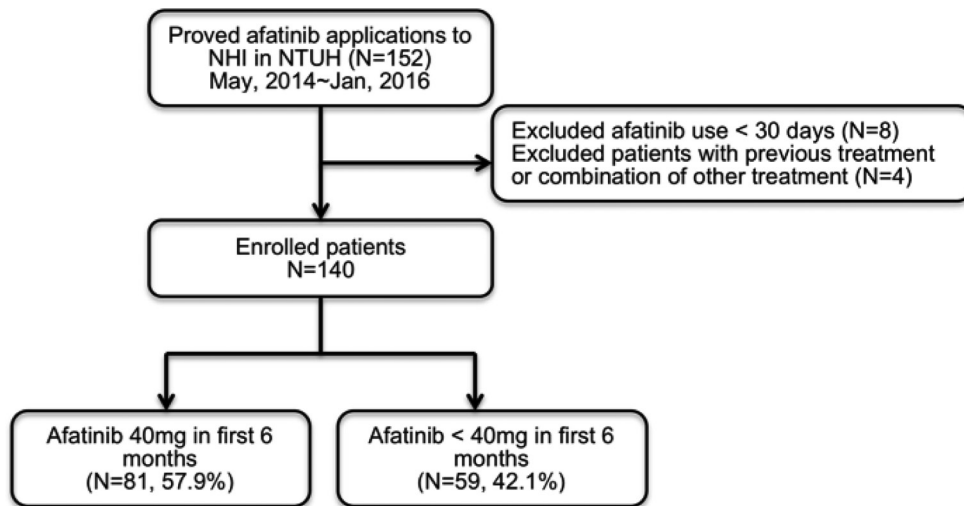

Supplementary Figure 1: Patient collection flow chart.

**Supplementary Table 1: Clinical characteristics of patients in whom afatinib treatment was withdrawn ( $n = 7$ )**

| <i>n</i> | Age (y)/sex | SS | ECOG PS | BMI  | cStage | EGFR mutation | Initial afatinib dose (mg) | TR | Time to DA (d) | Total afatinib (d) | Complication(s) | Substitute EGFR-TKI |
|----------|-------------|----|---------|------|--------|---------------|----------------------------|----|----------------|--------------------|-----------------|---------------------|
| 1        | 82/F        | NS | 1       | 23.1 | IV     | p.L858R       | 40.0                       | PR | 90             | 90                 | SR              | Gefitinib           |
| 2        | 62/M        | NS | 0       | 25.2 | IV     | p.L858R       | 40.0                       | PR | 30             | 30                 | IP              | Erlotinib           |
| 3        | 58/F        | NS | 0       | 23.4 | IV     | p.L858R       | 40.0                       | PR | 180            | 328                | P               | Erlotinib           |
| 4        | 52/F        | NS | 0       | 21.4 | IV     | p.L858R       | 40.0                       | SD | 60             | 120                | SR              | Gefitinib           |
| 5        | 72/F        | NS | 1       | 26.9 | IV     | 19DEL         | 30.0                       | PR | 240            | 353                | SR              | Erlotinib           |
| 6        | 63/M        | NS | 1       | 23.5 | IV     | 19DEL         | 40.0                       | PR | 110            | 330                | SR/OM           | Erlotinib           |
| 7        | 74/F        | NS | 1       | 24.1 | IV     | 20-INS        | 40.0                       | PR | 30             | 45                 | OM              | Gefitinib           |

BMI, body mass index; cStage, clinical stage; d, day; DA, dose adjustment; DEL, deletion; ECOG, Eastern Cooperative Oncology Group; EGFR, epidermal growth factor receptor; F, female; INS, insertion; IP, interstitial pneumonitis; M, male; NS, never smoked; OM, oral mucositis; P, paronychia; PR, partial response; PS, performance status; SD, stable disease; SR, skin rash; SS, smoking status; TKI, tyrosine kinase inhibitor; TR, treatment response; y, year

**Supplementary Table 2: Dose adjustments of afatinib-treated patients in a real-world cohort**

| Variable                            | Afatinib-treated patients  |                            |
|-------------------------------------|----------------------------|----------------------------|
|                                     | Initial 40 mg ( $n = 98$ ) | Initial 30 mg ( $n = 42$ ) |
| Dose adjustment, $n$ (%)            |                            |                            |
| Y                                   | 29 (29.6)                  | 9 (21.4)                   |
| N                                   | 69 (70.4)                  | 33 (78.6)                  |
| Dose adjustment sequence, $n$ (%)   |                            |                            |
| Time to first dose reduction (days) |                            |                            |
| < 180                               | 18 (62.1)                  | 7 (77.8)                   |
| ≥ 180                               | 11 (37.9)                  | 2 (22.2)                   |
| Second dose adjustment              |                            |                            |
| Dose escalation                     | 1 (3.4)                    | 5 (55.6)                   |
| Dose reduction                      | 4 (13.8)                   | 1 (11.1)                   |
| No change                           | 24 (82.8)                  | 3 (33.3)                   |

N, no; Y, yes

**Supplementary Table 3: Treatment responses according to *EGFR* mutation status**

| <i>EGFR</i> mutation status                              | Patients, <i>n</i> (%) | Treatment response, <i>n</i> (%)          |
|----------------------------------------------------------|------------------------|-------------------------------------------|
| Group 1 (classical mutation[s])                          | 108 (77.1)             | PR, 76 (70.4); SD, 26 (24.1); PD, 6 (5.5) |
| 19DEL                                                    | 81 (57.9)              | PR, 55 (67.9); SD, 21 (25.9); PD, 5 (6.2) |
| p.L858R                                                  | 24 (17.1)              | PR, 18 (75.0); SD, 5 (20.8); PD, 1 (4.2)  |
| p.L858R and 19DEL                                        | 3 (2.1)                | PR, 3 (100.0)                             |
| Group 2 (complex mutation with classical mutation)       | 6 (4.3)                | PR, 4 (66.7); SD, 2 (33.3)                |
| p.L858R and p.T790M                                      | 4 (2.9)                | PR, 2 (50.0); SD, 2 (50.0)                |
| p.L858R and p.S768I                                      | 1 (0.7)                | PR, 1 (100.0)                             |
| p.V765M and 19DEL                                        | 1 (0.7)                | PR, 1 (100.0)                             |
| Group 3 (rare mutation with or without complex mutation) | 26 (18.6)              | PR, 14 (53.9); SD, 9 (34.6); PD, 3 (11.5) |
| p.L861Q                                                  | 10 (7.2)               | PR, 5 (50.0); SD, 3 (30.0); PD, 2 (20.0)  |
| p.G719A                                                  | 6 (4.3)                | PR, 2 (33.3); SD, 4 (66.7)                |
| 20-INS                                                   | 4 (2.9)                | PR, 1 (25.0); SD, 2 (50.0); PD, 1 (25.0)  |
| p.E709L and p.G719A                                      | 1 (0.7)                | PR, 1 (100.0)                             |
| p.G719A and p.S768I                                      | 1 (0.7)                | PR, 1 (100.0)                             |
| p.G719A and p.T790M                                      | 1 (0.7)                | PR, 1 (100.0)                             |
| p.G719S and p.L747S                                      | 1 (0.7)                | PR, 1 (100.0)                             |
| p.L861R and p.R776G                                      | 1 (0.7)                | PR, 1 (100.0)                             |
| p.L861Q and p.S768I                                      | 1 (0.7)                | PR, 1 (100.0)                             |

DEL, deletion; INS, insertion; PD, progressive disease; PR, partial response; SD, stable disease.

**Supplementary Table 4: The results of MET expression and amplifications in adequate tumor tissues ( $n = 17$ )**

| <i>n</i> | Age (y)/sex | SS | <i>EGFR</i> mutation | MET in pre-afatinib tissues |          | MET in post-afatinib tissues |          | TR | PFS of afatinib (m) |
|----------|-------------|----|----------------------|-----------------------------|----------|------------------------------|----------|----|---------------------|
|          |             |    |                      | IHC                         | FISH     | IHC                          | FISH     |    |                     |
| 1        | 66/M        | CS | p.L858R and p.T790M  | 3+                          | Negative | 3+                           | Positive | PR | 5.0                 |
| 2        | 70/F        | NS | p.E709K and p.G719A  | 2-3+                        | Negative | 0-1+                         |          | PR | 10.5                |
| 3        | 44/M        | CS | 19DEL                | 2+                          | Negative | 3+                           | Negative | SD | 11.8                |
| 4        | 64/M        | NS | p.L858R              | 2+                          | Negative | 0-1+                         |          | PR | 19.0                |
| 5        | 57/F        | NS | 19DEL                | 2+                          | Negative | 0                            |          | PR | 11.0                |
| 6        | 51/M        | NS | 19DEL                | 0-1+                        |          | 3+                           | Negative | PR | 9.0                 |
| 7        | 58/M        | CS | p.L858R              | 0                           |          | 2+                           | Negative | SD | 9.3                 |
| 8        | 58/M        | NS | p.L858R and p.T790M  | 0-1+                        |          | 3+                           | Negative | SD | 4.0                 |
| 9        | 67/M        | CS | p.G719A              | 1+                          |          | 3+                           | Negative | SD | 6.0                 |
| 10       | 61/F        | NS | p.L858R              | 1+                          |          | 1+                           |          | PR | 8.3                 |
| 11       | 49/F        | NS | p.L858R              | 1+                          |          | 1+                           |          | PR | 7.0                 |
| 12       | 68/F        | NS | 20-INS               | 0-1+                        |          | 0-1+                         |          | SD | 3.7                 |
| 13       | 67/M        | CS | 19DEL                | 0-1+                        |          | 1+                           |          | SD | 8.1                 |
| 14       | 45/F        | NS | 19DEL                | 0                           |          | 0                            |          | PR | 8.7                 |
| 15       | 63/F        | NS | 19DEL                | 1+                          |          | 0-1+                         |          | PR | 17.3                |
| 16       | 54/M        | CS | p.L858R              | 0-1+                        |          | 0-1+                         |          | PR | 12.8                |
| 17       | 54/F        | NS | 19DEL                | NA                          |          | 2+                           | Negative | PD | 3.0                 |

CS, current smoker; DEL, deletion; EGFR, epidermal growth factor receptor; F, female; FISH, fluorescence *in situ* hybridization; IHC, Immunohistochemical; INS, insertion; M, male; m, months; NA: not available; NS, never smoked; PD, progressive disease; PR, partial response; PFS, progression-free survival; SD, stable disease; SS, smoking status; TKI, tyrosine kinase inhibitor; TR, treatment response
